# Supplementary material for: Tetragonality induced superconductivity in anti-ThCr2Si2-type RE2O2Bi (RE = rare earth) with Bi square nets
Source: Royal Society of Chemistry journal article supplement (doi:10.1039/c9dt04640b), 2020-01-01
Supplement: c9dt04640b1.pdf [file c9dt04640b1.pdf]

## Supporting Information

### **Tetragonality induced superconductivity in anti-ThCr<sub>2</sub>Si<sub>2</sub>-type RE<sub>2</sub>O<sub>2</sub>Bi (RE = rare earth) with Bi square net**

Ryosuke Sei,<sup>a,b</sup> Hideyuki Kawasoko,<sup>a</sup> Kota Matsumoto,<sup>a</sup> Masato Arimitsu,<sup>a</sup> Kyohei Terakado,<sup>a</sup>  
Daichi Oka,<sup>a</sup> Shintaro Fukuda,<sup>a</sup> Noriaki Kimura,<sup>c</sup> Hidetaka Kasai,<sup>d</sup> Eiji Nishibori,<sup>d</sup> Kenji Ohoyama,<sup>e</sup>  
Akinori Hoshikawa,<sup>f</sup> Toru Ishigaki,<sup>f</sup> Tetsuya Hasegawa,<sup>b</sup> and Tomoteru Fukumura<sup>\*a,g</sup>

<sup>a</sup>Department of Chemistry, Graduate School of Science, Tohoku University, Sendai 980-8578, Japan.

<sup>b</sup>Department of Chemistry, Graduate School of Science, The University of Tokyo, Tokyo 113-0033, Japan.

<sup>c</sup>Department of Physics, Graduate School of Science; Center for Low Temperature Science, Tohoku University, Sendai 980-8578, Japan.

<sup>d</sup>Division of Physics and Tsukuba Research Center for Energy Materials Science, Faculty of Pure and Applied Sciences, University of Tsukuba, Tsukuba, 305-8571, Japan.

<sup>e</sup>Graduate School of Science and Engineering, Ibaraki University, Tokai 319-1106, Japan.

<sup>f</sup>Frontier Research Center for Applied Atomic Sciences, Ibaraki University, Tokai, 319-1106, Japan.

<sup>g</sup>Advanced Institute for Materials Research and Core Research Cluster, Tohoku University, Sendai, 980-8577, Japan.

\* tomoteru.fukumura.e4@tohoku.ac.jp

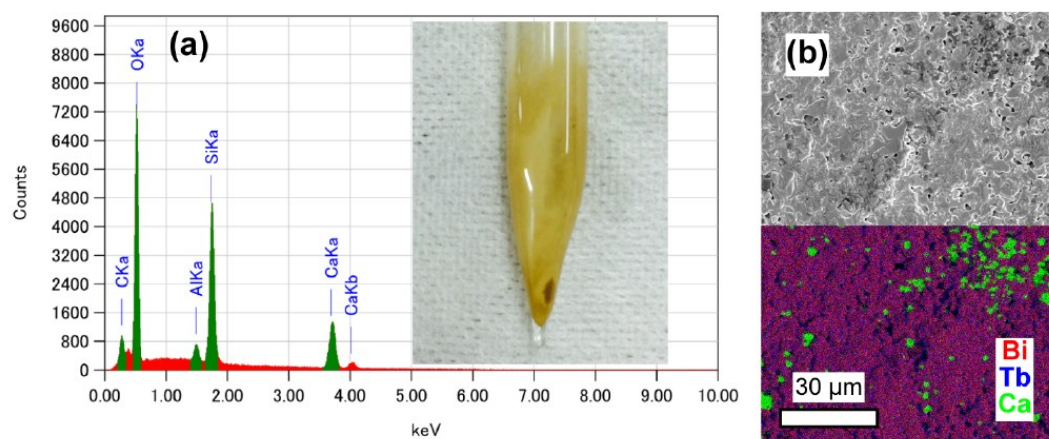

**Fig. S1** (a) EDX spectrum of the quartz tube after synthesis of excess-oxygen-incorporated  $\text{Tb}_2\text{O}_2\text{Bi}$  with  $\text{CaO}$ . Inset shows a photo of the quartz tube. (b) SEM image (top) and EDX mapping (bottom) of excess-oxygen-incorporated  $\text{Tb}_2\text{O}_2\text{Bi}$ .

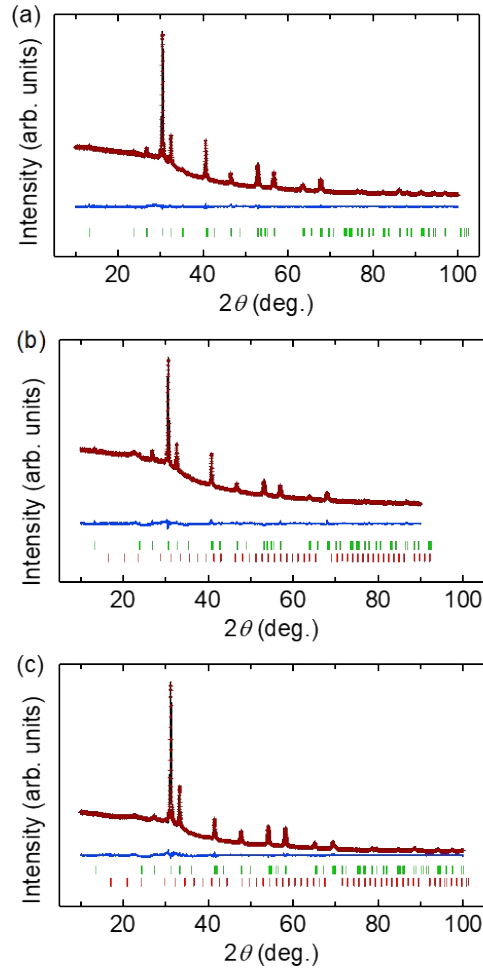

**Fig. S2** X-ray diffraction patterns of the sample with the nominal composition of (a)  $\text{Tb}_2\text{O}_{1.6}\text{Bi}_{1.4}$ , (b)  $\text{Dy}_2\text{O}_{1.4}\text{Bi}_{1.6}$ , and (c)  $\text{Lu}_2\text{O}_{1.3}\text{Bi}_{1.7}$  for resistivity measurement in PPMS. Brown, black, and blue curves denote measurement data, simulation pattern, and their difference, respectively. Green and red bars denote the diffraction positions of  $\text{RE}_2\text{O}_2\text{Bi}$  and  $\text{RE}_2\text{O}_3$  phases, respectively.

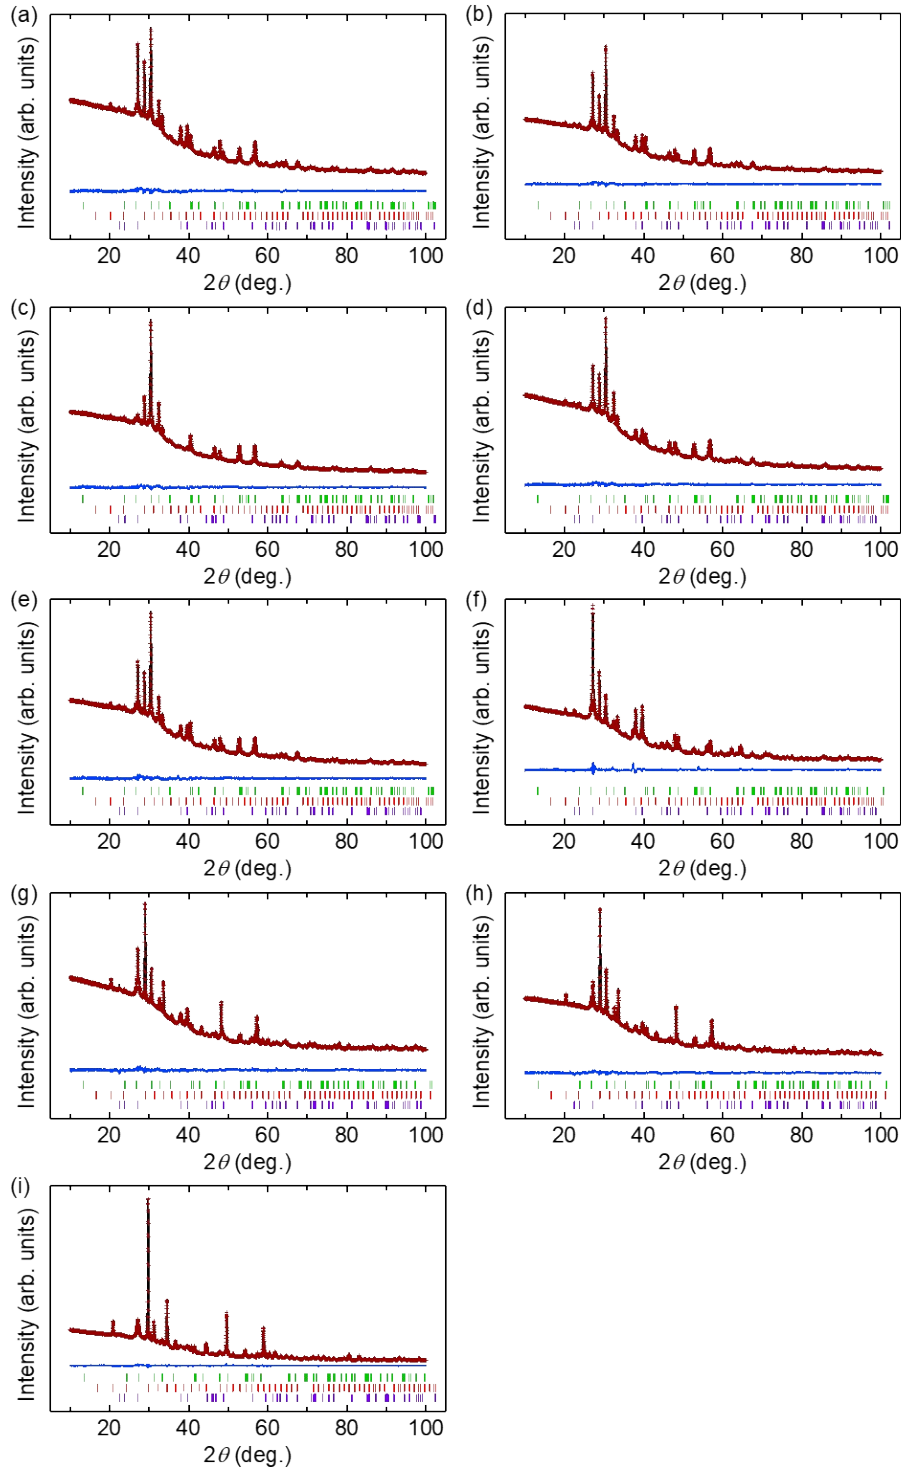

**Fig. S3** X-ray diffraction patterns of the sample with the nominal composition of (a)  $\text{Tb}_2\text{O}_{1.8}\text{Bi}_{1.4} + (\text{CaO})_{0.2}$ , (b)  $\text{Tb}_2\text{O}_{1.6}\text{Bi}_{1.6} + (\text{CaO})_{0.2}$ , (c)  $\text{Tb}_2\text{O}_{1.8}\text{Bi}_{1.4} + (\text{CaO})_{0.4}$ , (d)  $\text{Tb}_2\text{O}_{1.6}\text{Bi}_{1.4} + (\text{CaO})_{0.4}$ , (e)  $\text{Tb}_2\text{O}_{1.6}\text{Bi}_{1.4} + (\text{CaO})_{0.6}$ , (f)  $\text{Tb}_2\text{O}_{1.2}\text{Bi}_{2.0} + (\text{CaO})_{2.0}$ , (g)  $\text{Dy}_2\text{O}_{2.0}\text{Bi}_{1.2} + (\text{CaO})_{0.5}$ , (h)  $\text{Dy}_2\text{O}_{2.0}\text{Bi}_{1.0} + (\text{CaO})_{0.5}$ , and (i)  $\text{Lu}_2\text{O}_{2.0}\text{Bi}_{1.0} + (\text{CaO})_{0.5}$  for resistivity measurement in PPMS. Brown, black, and blue curves denote measurement data, simulation pattern, and their difference, respectively. Green, red, purple bars denote the diffraction positions of  $\text{RE}_2\text{O}_2\text{Bi}$ ,  $\text{RE}_2\text{O}_3$ , and Bi phases, respectively.

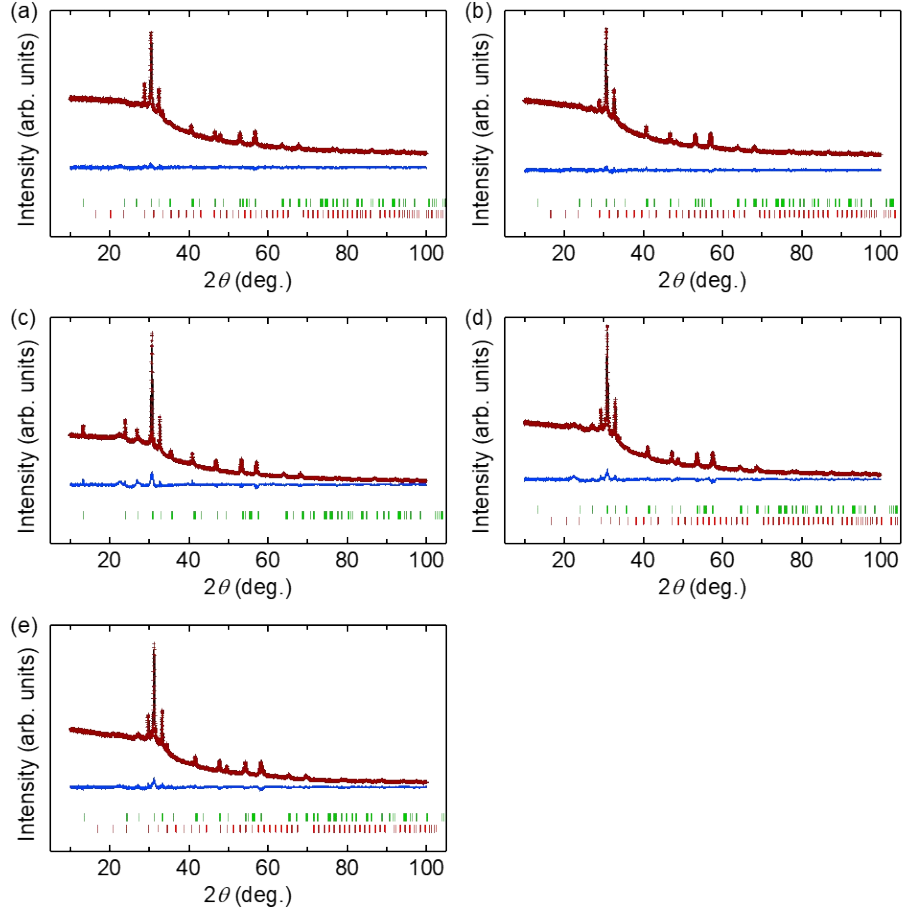

**Fig. S4** X-ray diffraction patterns of the sample with the nominal composition of (a)  $\text{Tb}_2\text{O}_{1.6}\text{Bi}_{1.4}$ , (b)  $\text{Dy}_2\text{O}_{1.4}\text{Bi}_{1.6}$ , (c)  $\text{Y}_2\text{O}_{1.3}\text{Bi}_{1.3}$ , (d)  $\text{Er}_2\text{O}_{1.4}\text{Bi}_{1.6}$ , and (e)  $\text{Lu}_2\text{O}_{1.3}\text{Bi}_{1.7}$  for resistivity measurement in a dilution refrigerator. Brown, black, and blue curves denote measurement data, simulation pattern, and their difference, respectively. Green and red bars denote the diffraction positions of  $\text{RE}_2\text{O}_2\text{Bi}$  and  $\text{RE}_2\text{O}_3$  phases, respectively.

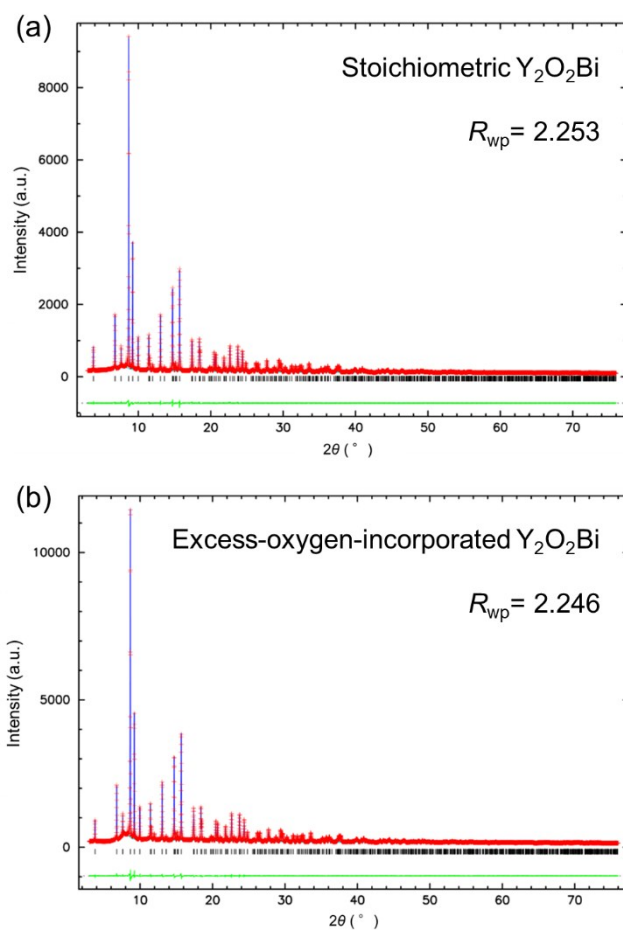

**Fig. S5** Synchrotron X-ray diffraction patterns and fitting results of Rietveld refinements for (a) stoichiometric and (b) excess-oxygen-incorporated  $\text{Y}_2\text{O}_2\text{Bi}$  samples. Red, blue, and green curves denote measurement data, simulation pattern, and their difference, respectively. Black bars indicate the diffraction positions of  $\text{Y}_2\text{O}_2\text{Bi}$  phases ( $R_{\text{wp}}$ :  $R$ -factor).

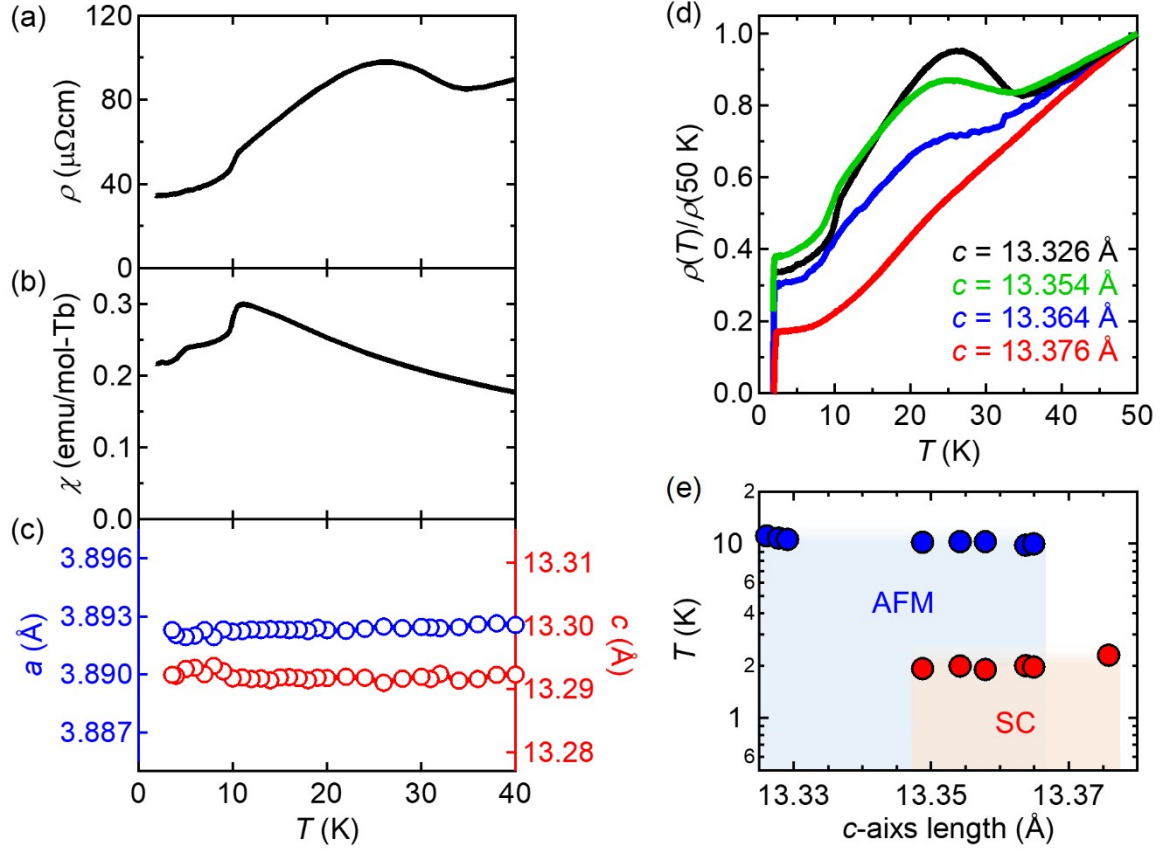

**Fig. S6** Temperature dependence of (a) resistivity, (b) magnetic susceptibility, and (c)  $a$ - and  $c$ - axis lengths for stoichiometric  $\text{Tb}_2\text{O}_2\text{Bi}$ . Standard deviations of  $a$ - and  $c$ - axis lengths were within the marker size in (c). (d) Temperature dependence of normalized resistivity for  $\text{Tb}_2\text{O}_2\text{Bi}$  with various amounts of oxygen. (e) Phase diagram of  $\text{Tb}_2\text{O}_2\text{Bi}$  as a function of  $c$ -axis length. Magnetic susceptibility was measured for the same  $\text{Tb}_2\text{O}_2\text{B}$  sample in Ref. 1.

Figs. S6a and S6b show the temperature dependence of resistivity and magnetic susceptibility, that was measured by a magnetometer (MPMS, Quantum Design), at low temperatures for stoichiometric  $\text{Tb}_2\text{O}_2\text{Bi}$  with  $c = 13.326 \text{ \AA}$ . From the resistivity measurements, three anomalies were observed at 11 K, 28 K, and 35 K. From the magnetic susceptibility and neutron diffraction measurements,<sup>1</sup> a kink at  $T = 11.1 \text{ K}$  corresponded to antiferromagnetic ordering, indicating that the anomaly in resistivity at 11 K could be attributed to the suppression of magnetic scattering (Fig. S6a). Because of no structural phase transition below 40 K (Fig. S6c), the anomalies at 28 K and 35 K could be attributed to the crystal-field effect and the Kondo scattering, respectively, as was discussed in the heavy fermion systems such as  $\text{CeIn}_3$ .<sup>2</sup> These behaviors of stoichiometric  $\text{Tb}_2\text{O}_2\text{Bi}$  clearly indicated a correlation between conduction carriers in Bi square net and magnetic ordering in  $\text{Tb}_2\text{O}_2$  layer. With increasing  $c$ -axis length from 13.345  $\text{\AA}$  to 13.365  $\text{\AA}$ , the anomaly at 11 K was slightly suppressed,

followed by the emergence of superconductivity below 2.2 K, suggesting the competition between superconductivity and magnetism (Figs. S6d and S6e). In  $\text{Tb}_2\text{O}_2\text{Bi}$  with  $c = 13.376 \text{ \AA}$ , only superconducting transition was observed below 2.2 K without antiferromagnetic transition.



**Table S1** Crystal structural data and superconducting transition temperature ( $T_c^{\text{onset}}$ ) of stoichiometric  $RE_2O_2Bi$  samples for resistivity measurement in PPMS ( $RE = Tb, Dy, \text{ and } Lu$ ;  $R_{wp}$ :  $R$ -factor,  $R_e$ : expected  $R$ -factor,  $S$ : goodness-of-fit indicator).

| Nominal composition      | Tb <sub>2</sub> O <sub>1.6</sub> Bi <sub>1.4</sub> | Dy <sub>2</sub> O <sub>1.4</sub> Bi <sub>1.6</sub> | Lu <sub>2</sub> O <sub>1.3</sub> Bi <sub>1.7</sub> |
|--------------------------|----------------------------------------------------|----------------------------------------------------|----------------------------------------------------|
| $a$ (Å)                  | 3.8997(2)                                          | 3.8813(1)                                          | 3.8077(3)                                          |
| $c$ (Å)                  | 13.3261(7)                                         | 13.2667(3)                                         | 13.0560(9)                                         |
| $V$ (Å <sup>3</sup> )    | 202.66(2)                                          | 199.85(1)                                          | 189.29(3)                                          |
| $RE\ z$                  | 0.3290(2)                                          | 0.3323(3)                                          | 0.3294(3)                                          |
| $R_{wp}$                 | 1.465                                              | 1.826                                              | 2.645                                              |
| $R_e$                    | 0.981                                              | 0.944                                              | 1.097                                              |
| $S$                      | 1.4939                                             | 1.9337                                             | 2.4108                                             |
| $RE-O$ (Å)               | 2.216                                              | 2.227                                              | 2.168                                              |
| $c/a$                    | 3.4172(3)                                          | 3.4181(1)                                          | 3.4289(3)                                          |
| $T_c^{\text{onset}}$ (K) | –                                                  | –                                                  | –                                                  |
| $RE_2O_2Bi$ (mol%)       | > 99                                               | 97.5                                               | 98.7                                               |
| $RE_2O_3$ (mol%)         | –                                                  | 2.5                                                | 1.3                                                |

**Table S2** Crystal structural data and superconducting transition temperature ( $T_c^{\text{onset}}$ ) of excess-oxygen-incorporated  $RE_2O_2Bi$  samples for resistivity measurement in PPMS ( $RE = Tb, Dy, \text{ and } Lu$ ;  $R_{wp}$ :  $R$ -factor,  $R_e$ : expected  $R$ -factor,  $S$ : goodness-of-fit indicator).

| Nominal composition      | $Tb_2O_{1.8}Bi_{1.4} + (CaO)_{0.2}$ | $Tb_2O_{1.6}Bi_{1.6} + (CaO)_{0.2}$ | $Tb_2O_{1.8}Bi_{1.4} + (CaO)_{0.4}$ | $Tb_2O_{1.6}Bi_{1.4} + (CaO)_{0.4}$ | $Tb_2O_{1.6}Bi_{1.4} + (CaO)_{0.6}$ | $Tb_2O_{1.2}Bi_{2.0} + (CaO)_{2.0}$ | $Dy_2O_{2.0}Bi_{1.2} + (CaO)_{0.5}$ | $Dy_2O_{2.0}Bi_{1.0} + (CaO)_{0.5}$ | $Lu_2O_{2.0}Bi_{1.0} + (CaO)_{0.5}$ |
|--------------------------|-------------------------------------|-------------------------------------|-------------------------------------|-------------------------------------|-------------------------------------|-------------------------------------|-------------------------------------|-------------------------------------|-------------------------------------|
| $a$ (Å)                  | 3.8992(4)                           | 3.8997(4)                           | 3.8991(5)                           | 3.8996(5)                           | 3.8994(4)                           | 3.8987(4)                           | 3.8807(3)                           | 3.8791(3)                           | 3.8061(3)                           |
| $c$ (Å)                  | 13.3488(13)                         | 13.3542(13)                         | 13.3579(17)                         | 13.3638(15)                         | 13.3649(15)                         | 13.376(2)                           | 13.3035(15)                         | 13.2990(11)                         | 13.0633(7)                          |
| $V$ (Å <sup>3</sup> )    | 202.95(3)                           | 203.09(3)                           | 203.08(4)                           | 203.22(4)                           | 203.22(4)                           | 203.31(5)                           | 200.35(3)                           | 200.11(3)                           | 189.24(2)                           |
| $RE\ z$                  | 0.3272(4)                           | 0.3286(3)                           | 0.3279(4)                           | 0.3285(5)                           | 0.3275(3)                           | 0.3221(5)                           | 0.3222(4)                           | 0.3273(7)                           | 0.3251(4)                           |
| $R_{wp}$                 | 1.253                               | 1.241                               | 1.297                               | 1.191                               | 1.281                               | 2.03                                | 1.307                               | 1.193                               | 1.947                               |
| $R_e$                    | 0.827                               | 0.997                               | 0.814                               | 0.853                               | 0.833                               | 0.872                               | 0.826                               | 0.79                                | 0.941                               |
| $S$                      | 1.5152                              | 1.4952                              | 1.5942                              | 1.3968                              | 1.5381                              | 2.3086                              | 1.5818                              | 1.5092                              | 2.0677                              |
| $RE-O$ (Å)               | 2.205                               | 2.214                               | 2.210                               | 2.214                               | 2.208                               | 2.175                               | 2.165                               | 2.195                               | 2.141                               |
| $c/a$                    | 3.4235(5)                           | 3.4244(5)                           | 3.4259(6)                           | 3.4270(6)                           | 3.4274(5)                           | 3.4309(6)                           | 3.4281(5)                           | 3.4284(4)                           | 3.4322(3)                           |
| $T_c^{\text{onset}}$ (K) | 1.92                                | 1.99                                | 1.9                                 | 2.02                                | 1.96                                | 2.29                                | 2.1                                 | 2.09                                | 2.29                                |
| $RE_2O_2Bi$ (mol%)       | 30.6                                | 36.0                                | 59.1                                | 37.9                                | 39.2                                | 8.3                                 | 10.1                                | 15.9                                | 6.5                                 |
| $RE_2O_3$ (mol%)         | 28.5                                | 22.9                                | 26.5                                | 24.0                                | 25.8                                | 20.8                                | 46.3                                | 54.4                                | 64.8                                |
| Bi (mol%)                | 40.9                                | 41.1                                | 14.4                                | 38.0                                | 35.0                                | 70.9                                | 43.7                                | 29.7                                | 28.6                                |

**Table S3** Crystal structural data and superconducting transition temperature ( $T_c^{\text{onset}}$ ) of stoichiometric  $RE_2O_2Bi$  samples for resistivity measurement in a dilution refrigerator ( $RE = Tb, Dy, Y, Er, \text{ and } Lu$ ;  $R_{wp}$ :  $R$ -factor,  $R_e$ : expected  $R$ -factor,  $S$ : goodness-of-fit indicator).

| Nominal composition      | Tb <sub>2</sub> O <sub>1.6</sub> Bi <sub>1.4</sub> | Dy <sub>2</sub> O <sub>1.4</sub> Bi <sub>1.6</sub> | Y <sub>2</sub> O <sub>1.3</sub> Bi <sub>1.3</sub> | Er <sub>2</sub> O <sub>1.4</sub> Bi <sub>1.6</sub> | Lu <sub>2</sub> O <sub>1.3</sub> Bi <sub>1.7</sub> |
|--------------------------|----------------------------------------------------|----------------------------------------------------|---------------------------------------------------|----------------------------------------------------|----------------------------------------------------|
| $a$ (Å)                  | 3.8990(2)                                          | 3.88093(12)                                        | 3.8744(2)                                         | 3.84833(14)                                        | 3.80688(12)                                        |
| $c$ (Å)                  | 13.3253(8)                                         | 13.2696(6)                                         | 13.2468(9)                                        | 13.1743(8)                                         | 13.0211(8)                                         |
| $V$ (Å <sup>3</sup> )    | 202.57(2)                                          | 199.863(13)                                        | 198.850(2)                                        | 195.11(2)                                          | 188.706(14)                                        |
| $RE\ z$                  | 0.3338(7)                                          | 0.3328(6)                                          | 0.3310(4)                                         | 0.3262(4)                                          | 0.3246(3)                                          |
| $R_{wp}$                 | 1.823                                              | 1.74                                               | 4.154                                             | 3.305                                              | 2.97                                               |
| $R_e$                    | 1.518                                              | 1.461                                              | 1.663                                             | 1.704                                              | 1.705                                              |
| $S$                      | 1.201                                              | 1.1909                                             | 2.4977                                            | 1.9399                                             | 1.7415                                             |
| $RE-O$ (Å)               | 2.247                                              | 2.230                                              | 2.215                                             | 2.170                                              | 2.137                                              |
| $c/a$                    | 3.4177(2)                                          | 3.4192(2)                                          | 3.4191(3)                                         | 3.4234(2)                                          | 3.4204(2)                                          |
| $T_c^{\text{onset}}$ (K) | –                                                  | –                                                  | 1.50                                              | 1.31                                               | 1.26                                               |
| $RE_2O_2Bi$ (mol%)       | 69.9                                               | 85.1                                               | > 99                                              | 85.1                                               | 77.5                                               |
| $RE_2O_3$ (mol%)         | 30.1                                               | 14.9                                               | –                                                 | 14.9                                               | 22.5                                               |

**Table S4** Crystal structural data of stoichiometric and excess-oxygen-incorporated  $Y_2O_2Bi$  samples evaluated by synchrotron X-ray diffraction measurement. ( $R_{wp}$ :  $R$ -factor).

| Nominal composition                   | $a$ (Å)    | $c$ (Å)     | $v$ (Å <sup>3</sup> ) | $Y\ z$     | $R_{wp}$ | $RE-O$ (Å) | $c/a$      | Purity (mol%) |
|---------------------------------------|------------|-------------|-----------------------|------------|----------|------------|------------|---------------|
| Stoichiometric $Y_2O_2Bi$             | 3.86346(2) | 13.21274(9) | 197.218(2)            | 0.33325(4) | 2.253    | 2.223      | 3.41992(3) | > 99          |
| Excess-oxygen-incorporated $Y_2O_2Bi$ | 3.86526(2) | 13.23378(9) | 197.716(2)            | 0.33294(4) | 2.246    | 2.223      | 3.42377(3) | > 99          |

## References

1. H. Kawasoko, K. Ohoyama, R. Sei, K. Matsumoto, D. Oka, A. Hoshikawa, T. Ishigaki, T. Fukumura, *AIP Adv.* 2019, **9**, 115301.
2. G. Knebel, D. Braithwaite, P. C. Canfield, G. Lapertot, J. Flouquet,, *Phys. Rev. B* 2001, **65**, 024425.
